# Supplementary material
Source: PubMed Central journal article supplement (PMC3970173)

## Supplemental Figures

Cadherin-11 expression patterns in heart valves: association with embryonic cushion formation, valve maturation, and valve interstitial cell calcification behaviors.

Jingjing Zhou<sup>1</sup>, Caitlin Bowen<sup>1</sup>, Gloria Lu<sup>1</sup>, Calvin Knapp III<sup>1</sup>, Andrew Recknagel<sup>1</sup>, Russell A. Norris<sup>2</sup>, and Jonathan T. Butcher<sup>1</sup>

Affiliations:

<sup>1</sup>Department of Biomedical Engineering, Cornell University  
526 Campus Road, 310 Weill Hall, Ithaca, NY 14850  
USA

<sup>2</sup>Department of Regenerative Medicine  
Medical University of South Carolina  
270 Ashley Ave, Charleston, SC 29425  
USA

Supp. Fig. 1. Co-staining of cad-11 with  $\alpha$ SMA, vimentin, or runx2 in the VICs of healthy human valve samples. **A**, Double immunofluorescence staining of cad-11 protein (red) with  $\alpha$ SMA protein (green) in the VICs of human calcified valve samples. **B**, Double immunofluorescence staining of cad-11 protein (red) with vimentin protein (green) in the VICs of human calcified valve samples. **C**, Double immunofluorescence staining of cad-11 protein (red) with runx2 protein (green) in the VICs of human calcified valve samples. Scale bar = 50  $\mu$ m.

Supp. Fig. 1

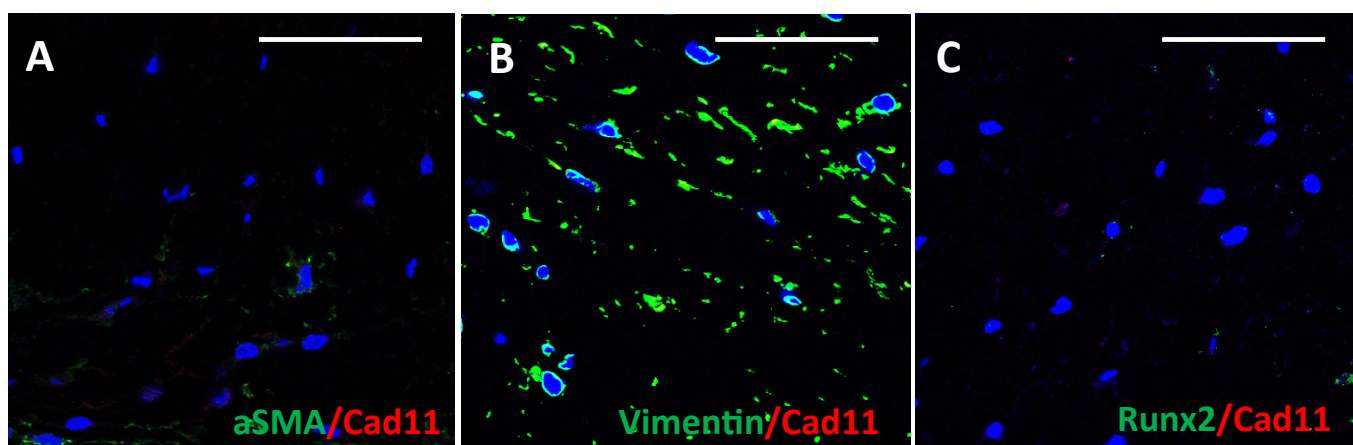

Supplement: NIHMS536285-supplement-01.pdf [file NIHMS536285-supplement-01.pdf]
